# Supplementary material
Source: PubMed Central journal article supplement (PMC3840156)
Supplement: NIHMS526005-supplement-supplement_1.pdf [file NIHMS526005-supplement-supplement_1.pdf]

**Supplementary Table.** Primary sequence mutations in p53 exons 5-8.

| Histological Type     | Grade | Stage | p53 Mutation in Primary Ovarian Cancer |      |                 | p53 Mutation in Extra-pelvic Implants |      |                 | Amino Acid Change |
|-----------------------|-------|-------|----------------------------------------|------|-----------------|---------------------------------------|------|-----------------|-------------------|
|                       |       |       | Primary Site                           | Exon | Codon           | Extra-pelvic Site                     | Exon | Codon           |                   |
| Serous adenocarcinoma | High  | 3C    | Rt Ovary                               | WT   | WT              | Omentum                               | WT   | WT              | WT                |
| Serous adenocarcinoma | High  | 4     | Rt Ovary                               | 6    | 220, TAT to TGT | Omentum                               | 6    | 220, TAT to TGT | Tyr to Cys        |
|                       |       |       |                                        | 7    | 225, GTT to GTG |                                       | 7    | 225, GTT to GTG | Val to Val        |
| Serous adenocarcinoma | High  | 3C    | Lt Ovary                               | WT   | WT              | Omentum                               | WT   | WT              | WT                |
| Serous adenocarcinoma | High  | 3C    | Rt Ovary                               | 8    | 294, GAG to TAG | Soft tissue, Pelvis                   | 8    | 294, GAG to TAG | Glu to STOP       |
| Serous                | High  | 3C    | Lt Ovary                               | WT   | WT              | Omentum                               | WT   | WT              | WT                |

|                                        |              |    |          |    |                    |            |    |                    |            |
|----------------------------------------|--------------|----|----------|----|--------------------|------------|----|--------------------|------------|
| adenocarcinoma                         |              |    |          |    |                    |            |    |                    |            |
| Adenocarcinoma<br>w/papillary features | High         | 4  | Lt Ovary | WT | WT                 | Omentum    | WT | WT                 | WT         |
| Adenocarcinoma<br>w/papillary features | High         | 3C | Lt Ovary | 7  | 248, CGG to<br>CAG | Omentum    | 7  | 248, CGG to<br>CAG | Arg to Gln |
| Serous<br>adenocarcinoma               | High         | 3C | Rt Ovary | 7  | 248, CGG to<br>CAG | Omentum    | 7  | 248, CGG to<br>CAG | Arg to Gln |
| Serous<br>adenocarcinoma               | High         | 4  | Rt Ovary | WT | WT                 | Colon      | WT | WT                 | WT         |
| Adenocarcinoma                         | High         | 3C | Rt Ovary | WT | WT                 | Omentum    | WT | WT                 | WT         |
| Adenocarcinoma<br>w/papillary features | Not<br>given | 3C | Lt Ovary | WT | WT                 | Omentum    | WT | WT                 | WT         |
| Serous<br>adenocarcinoma               | High         | 3C | Lt Ovary | WT | WT                 | Omentum    | WT | WT                 | WT         |
| Adenocarcinoma<br>w/papillary features | High         | 2B | Rt Ovary | 6  | 220, TAT to<br>TGT | Cul-de-sac | 6  | 220, TAT to TGT    | Tyr to Cys |

|                                     |      |    |          |    |                 |         |    |                 |            |
|-------------------------------------|------|----|----------|----|-----------------|---------|----|-----------------|------------|
| Clear cell carcinoma                | High | 3C | Lt Ovary | WT | WT              | Omentum | WT | WT              | WT         |
| Adenocarcinoma w/papillary features | High | 3C | Lt Ovary | 7  | 245, GGC to GAC | Omentum | 7  | 245, GGC to GAC | Gly to Asp |
| Adenocarcinoma w/papillary features | High | 3C | Rt Ovary | 7  | 248, CGG to CAG | Omentum | 7  | 248, CGG to CAG | Arg to Gln |
| Adenocarcinoma                      | High | 3C | Lt Ovary | WT | WT              | Colon   | WT | WT              | WT         |
| Serous adenocarcinoma               | High | 3C | Rt Ovary | WT | WT              | Omentum | WT | WT              | WT         |
| Serous adenocarcinoma               | High | 3C | Rt Ovary | WT | WT              | Omentum | WT | WT              | WT         |
| Serous adenocarcinoma               | High | 4  | Rt Ovary | WT | WT              | Omentum | WT | WT              | WT         |
| Adenocarcinoma                      | High | 2C | Rt Ovary | WT | WT              | Omentum | WT | WT              | WT         |
| Adenocarcinoma                      | High | 3C | Rt Ovary | WT | WT              | Omentum | WT | WT              | WT         |
| Adenocarcinoma                      | High | 4  | Rt Ovary | WT | WT              | Omentum | WT | WT              | WT         |

|                       |          |    |              |    |                 |                          |    |                 |                    |
|-----------------------|----------|----|--------------|----|-----------------|--------------------------|----|-----------------|--------------------|
| w/papillary features  |          |    |              |    |                 |                          |    |                 |                    |
| Serous adenocarcinoma | High     | 3C | Rt Ovary     | 7  | 234, TAC to TGC | Omentum                  | 7  | 234, TAC to TGC | Tyr to Cys         |
| Serous adenocarcinoma | High     | 3C | Rt, Lt Ovary | WT | WT              | Omentum                  | WT | WT              | WT                 |
| Adenocarcinoma        | High     | 3C | Rt Ovary     | 5  | 151, CCC to ^CC | Omentum                  | 5  | 151, CCC to ^CC | Pro to Frame shift |
| Adenocarcinoma        | High     | 3B | Rt, Lt Ovary | WT | WT              | Omentum                  | WT | WT              | WT                 |
| Serous adenocarcinoma | Moderate | 3C | Rt Ovary     | WT | WT              | Soft tissue (periaortic) | WT | WT              | WT                 |
| Serous adenocarcinoma | High     | 3C | Rt, Lt Ovary | 8  | 282, CGG to TGG | Omentum                  | 8  | 282, CGG to TGG | Asp to Trp         |
| Clear cell carcinoma  | High     | 3C | Lt Ovary     | 6  | 213, CGA to CGG | Omentum                  | 6  | 213, CGA to CGG | Arg to Arg         |
|                       |          |    |              | 7  | 245, GGC to GAC |                          | 7  | 245, GGC to GAC | Gly to Asp         |

Abbreviations: Lt, left; Rt, right; WT, wild-type.

| Pairwise analysis | Appendix 1. Number of Probesets with >2-fold change in expression |                            |                                      |
|-------------------|-------------------------------------------------------------------|----------------------------|--------------------------------------|
|                   | Sample                                                            | Normal Ovary versus pelvic | Normal ovary vs extra-pelvic implant |
| 1                 | 6339                                                              | 8137                       | 2413                                 |
| 2                 | 6562                                                              | 7483                       | 2813                                 |
| 3                 | 6873                                                              | 6608                       | 3464                                 |
| 4                 | 7049                                                              | 7069                       | 1032                                 |
| 5                 | 8012                                                              | 6834                       | 1710                                 |
| 6                 | 8052                                                              | 7304                       | 2446                                 |
| 7                 | 8364                                                              | 7951                       | 335                                  |
| 8                 | 6645                                                              | 6886                       | 6220                                 |
| 9                 | 7229                                                              | 7343                       | 86                                   |
| 10                | 8469                                                              | 7497                       | 2048                                 |
| 11                | 8069                                                              | 7980                       | 2151                                 |
| 12                | 8321                                                              | 8192                       | 596                                  |
| 13                | 7944                                                              | 7867                       | 683                                  |
| 14                | 8080                                                              | 8836                       | 1135                                 |
| 15                | 7157                                                              | 8225                       | 1120                                 |
| 16                | 7249                                                              | 7105                       | 874                                  |
| 17                | 7171                                                              | 7682                       | 600                                  |
| 18                | 7424                                                              | 7907                       | 660                                  |
| 19                | 7754                                                              | 8244                       | 545                                  |
| 20                | 8342                                                              | 8130                       | 980                                  |
| 21                | 6790                                                              | 8024                       | 138                                  |
| 22                | 7341                                                              | 7620                       | 2020                                 |
| 23                | 6876                                                              | 8007                       | 925                                  |
| 24                | 6728                                                              | 8127                       | 3449                                 |
| 25                | 8144                                                              | 7833                       | 600                                  |
| 26                | 7717                                                              | 7888                       | 545                                  |
| 27                | 7539                                                              | 6968                       | 1630                                 |
| 28                | 6965                                                              | 7629                       | 620                                  |
| 29                | 6793                                                              | 9087                       | 850                                  |
| 30                | 5749                                                              | 8706                       | 1213                                 |
| 31                | 6304                                                              | 6878                       | 4084                                 |
| <b>MEAN</b>       | <b>7356</b>                                                       | <b>7743</b>                | <b>1548</b>                          |

**Grouped analysis: Pathways unique to grouped NOSE versus grouped Extra-pelvic implants**

|    | pathway name                                                                                      | FDR<0.05? | p-value  |
|----|---------------------------------------------------------------------------------------------------|-----------|----------|
| 1  | Immune response_Immunological synapse formation                                                   | yes       | 9.08E-05 |
| 2  | Apoptosis and survival_Role of IAP-proteins in apoptosis                                          | yes       | 3.69E-04 |
| 3  | Oxidative stress_Angiotensin II-induced production of ROS                                         | yes       | 7.31E-04 |
| 4  | Development_Mu-type opioid receptor signaling via Beta-arrestin                                   | yes       | 8.11E-04 |
| 5  | Development_Activation of ERK by Kappa-type opioid receptor                                       | yes       | 8.54E-04 |
| 6  | Immune response_Histamine signaling in dendritic cells                                            | yes       | 9.43E-04 |
| 7  | Glutathione metabolism / Rodent version                                                           | no        | 3.01E-02 |
| 8  | Signal transduction_JNK pathway                                                                   | yes       | 1.96E-03 |
| 9  | Immune response_Delta-type opioid receptor signaling in T-cells                                   | yes       | 1.99E-03 |
| 10 | Immune response_NF-AT signaling and leukocyte interactions                                        | no        | 3.15E-03 |
| 11 | Immune response_IL-15 signaling                                                                   | no        | 4.02E-03 |
| 12 | Chemotaxis_Inhibitory action of lipoxins on IL-8- and Leukotriene B4-induced neutrophil migration | no        | 5.31E-03 |
| 13 | Immune response_PGE2 common pathways                                                              | no        | 5.84E-03 |
| 14 | Immune response_IFN alpha/beta signaling pathway                                                  | no        | 6.44E-03 |
| 15 | Apoptosis and survival_Apoptotic Activin A signaling                                              | no        | 7.47E-03 |
| 16 | Cytoskeleton remodeling_TGF, WNT and cytoskeletal remodeling                                      | no        | 8.71E-03 |
| 17 | Inhibitory action of Lipoxins on neutrophil migration                                             | no        | 9.13E-03 |
| 18 | Immune response_CCR5 signaling in macrophages and T lymphocytes                                   | no        | 9.92E-03 |
| 19 | Immune response_Neurotensin-induced activation of IL-8 in colonocytes                             | no        | 1.02E-02 |
| 20 | Neurophysiological process_HTR1A receptor signaling in neuronal cells                             | no        | 1.02E-02 |
| 21 | Regulation of lipid metabolism_G-alpha(q) regulation of lipid metabolism                          | no        | 1.08E-02 |
| 22 | Apoptosis and survival_FAS signaling cascades                                                     | no        | 1.12E-02 |
| 23 | Development_Angiotensin signaling via PYK2                                                        | no        | 1.12E-02 |
| 24 | G-protein signaling_RhoB regulation pathway                                                       | no        | 1.31E-02 |
| 25 | Development_Ligand-independent activation of ESR1 and ESR2                                        | no        | 1.36E-02 |
| 26 | Immune response_PGE2 signaling in immune response                                                 | no        | 1.36E-02 |
| 27 | Development_Gastrin in cell growth and proliferation                                              | no        | 1.36E-02 |
| 28 | Cell adhesion_Chemokines and adhesion                                                             | no        | 1.41E-02 |
| 29 | Development_G-CSF-induced myeloid differentiation                                                 | no        | 1.43E-02 |
| 30 | Development_G-Proteins mediated regulation MAPK-ERK signaling                                     | no        | 1.48E-02 |
| 31 | Transcription_Transcription factor Tubby signaling pathways                                       | no        | 1.56E-02 |
| 32 | Development_Beta-adrenergic receptors regulation of ERK                                           | no        | 1.62E-02 |
| 33 | Immune response_Fc gamma R-mediated phagocytosis in macrophages                                   | no        | 1.62E-02 |
| 34 | Cell adhesion_Integrin-mediated cell adhesion and migration                                       | no        | 1.76E-02 |
| 35 | Signal transduction_ERK1/2 signaling pathway                                                      | no        | 1.79E-02 |
| 36 | Development_A3 receptor signaling                                                                 | no        | 1.91E-02 |
| 37 | Development_G-CSF signaling                                                                       | no        | 1.91E-02 |
| 38 | Development_Angiotensin activation of ERK                                                         | no        | 1.98E-02 |

|    |                                                                                                          |    |          |
|----|----------------------------------------------------------------------------------------------------------|----|----------|
| 39 | Apoptosis and survival_Caspase cascade                                                                   | no | 1.98E-02 |
| 40 | Cell adhesion_IL-8-dependent cell migration and adhesion                                                 | no | 1.98E-02 |
| 41 | Neurophysiological process_Corticoliberin signaling via CRHR1                                            | no | 2.07E-02 |
| 42 | Protein folding_Membrane trafficking and signal transduction of G-alpha (i) heterotrimeric G-protein     | no | 2.11E-02 |
| 43 | G-protein signaling_G-Protein beta/gamma signaling cascades                                              | no | 2.19E-02 |
| 44 | Immune response_Role of the Membrane attack complex in cell survival                                     | no | 2.19E-02 |
| 45 | G-protein signaling_G-Protein alpha-q signaling cascades                                                 | no | 2.19E-02 |
| 46 | Signal transduction_Activation of PKC via G-Protein coupled receptor                                     | no | 2.41E-02 |
| 47 | Development_FGF-family signaling                                                                         | no | 2.41E-02 |
| 48 | G-protein signaling_Proinsulin C-peptide signaling                                                       | no | 2.41E-02 |
| 49 | Immune response_Antiviral actions of Interferons                                                         | no | 2.41E-02 |
| 50 | Development_EPO-induced Jak-STAT pathway                                                                 | no | 2.42E-02 |
| 51 | Immune response_Inflammasome in inflammatory response                                                    | no | 2.42E-02 |
| 52 | Immune response_Oncostatin M signaling via MAPK in mouse cells                                           | no | 2.42E-02 |
| 53 | G-protein signaling_S1P2 receptor signaling                                                              | no | 2.42E-02 |
| 54 | Cell cycle_Influence of Ras and Rho proteins on G1/S Transition                                          | no | 2.60E-02 |
| 55 | Immune response_IL-9 signaling pathway                                                                   | no | 2.65E-02 |
| 56 | G-protein signaling_Rac2 regulation pathway                                                              | no | 2.65E-02 |
| 57 | Immune response_TLR signaling pathways                                                                   | no | 2.79E-02 |
| 58 | Immune response_Oncostatin M signaling via MAPK in human cells                                           | no | 2.90E-02 |
| 59 | Development_S1P4 receptor signaling pathway                                                              | no | 3.13E-02 |
| 60 | Immune response_MIF-mediated glucocorticoid regulation                                                   | no | 3.13E-02 |
| 61 | Immune response_Role of integrins in NK cells cytotoxicity                                               | no | 3.16E-02 |
| 62 | Immune response_Human NKG2D signaling                                                                    | no | 3.16E-02 |
| 63 | Cell adhesion_Integrin inside-out signaling                                                              | no | 3.20E-02 |
| 64 | G-protein signaling_Regulation of p38 and JNK signaling mediated by G-proteins                           | no | 3.44E-02 |
| 65 | Apoptosis and survival_Ceramides signaling pathway                                                       | no | 3.73E-02 |
| 66 | Immune response_Th1 and Th2 cell differentiation                                                         | no | 3.73E-02 |
| 67 | Development_Dopamine D2 receptor transactivation of EGFR                                                 | no | 3.93E-02 |
| 68 | Development_VEGF-family signaling                                                                        | no | 4.04E-02 |
| 69 | Neurophysiological process_NMDA-dependent postsynaptic long-term potentiation in CA1 hippocampal neurons | no | 4.15E-02 |
| 70 | Serotonin modulation of dopamine release in nicotine addiction                                           | no | 4.35E-02 |
| 71 | Apoptosis and survival_Lymphotoxin-beta receptor signaling                                               | no | 4.35E-02 |
| 72 | Immune response_Murine NKG2D signaling                                                                   | no | 4.35E-02 |
| 73 | Development_Angiotensin signaling via beta-Arrestin                                                      | no | 4.37E-02 |
| 74 | Development_Alpha-2 adrenergic receptor activation of ERK                                                | no | 4.67E-02 |
| 75 | Development_ACM2 and ACM4 activation of ERK                                                              | no | 4.68E-02 |
| 76 | Signal transduction_AKT signaling                                                                        | no | 4.68E-02 |
| 77 | Immune response_IL-7 signaling in B lymphocytes                                                          | no | 4.68E-02 |
| 78 | Development_S1P3 receptor signaling pathway                                                              | no | 4.68E-02 |

|    |                                                                    |    |          |
|----|--------------------------------------------------------------------|----|----------|
| 79 | Signal transduction_AKT signaling                                  | no | 4.68E-02 |
| 80 | Immune response_HTR2A-induced activation of cPLA2                  | no | 4.68E-02 |
| 81 | G-protein signaling_Ras family GTPases in kinase cascades (scheme) | no | 4.83E-02 |

ACCEPTED MANUSCRIPT



**Individual primary pelvic (n=30) versus extra-pelvic implant (n=30). Pathways common to  $\geq 15$  paired samples.**

| <b>Appendix 3</b> | <b>Pathway name</b>                                                                                  | <b>common to # pairs</b> |
|-------------------|------------------------------------------------------------------------------------------------------|--------------------------|
| 1                 | Cell adhesion_ECM remodeling                                                                         | 27                       |
| 2                 | CXC Chemokine-receptor family                                                                        | 25                       |
| 3                 | Cell adhesion_Cell-matrix glycoconjugates                                                            | 23                       |
| 4                 | Cell adhesion_Chemokines and adhesion                                                                | 23                       |
| 5                 | Development_Regulation of epithelial-to-mesenchymal transition (EMT)                                 | 23                       |
| 6                 | Development_Hedgehog and PTH signaling pathways in bone and cartilage development                    | 20                       |
| 7                 | Role of Diethylhexyl Phthalate and Tributyltin in fat cell differentiation                           | 20                       |
| 8                 | Development_Beta-adrenergic receptors signaling via cAMP                                             | 18                       |
| 9                 | Immune response_IL-17 signaling pathways                                                             | 18                       |
| 10                | Protein folding_Membrane trafficking and signal transduction of G-alpha (i) heterotrimeric G-protein | 18                       |
| 11                | Cardiac Hypertrophy_NF-AT signaling in Cardiac Hypertrophy                                           | 17                       |
| 12                | Cell adhesion_Plasmin signaling                                                                      | 17                       |
| 13                | Development_TGF-beta-dependent induction of EMT via SMADs                                            | 17                       |
| 14                | Development_WNT signaling pathway. Part 2                                                            | 17                       |
| 15                | Immune response_Histamine H1 receptor signaling in immune response                                   | 17                       |
| 16                | Cytoskeleton remodeling_TGF, WNT and cytoskeletal remodeling                                         | 16                       |
| 17                | Development_Role of Activin A in cell differentiation and proliferation                              | 16                       |
| 18                | Development_TGF-beta-dependent induction of EMT via MAPK                                             | 16                       |
| 19                | Immune response_HMGB1/RAGE signaling pathway                                                         | 16                       |
| 20                | PGE2 pathways in cancer                                                                              | 16                       |
| 21                | Chemotaxis_Leukocyte chemotaxis                                                                      | 15                       |
| 22                | Immune response_Histamine signaling in dendritic cells                                               | 15                       |
| 23                | Immune response_MIF-mediated glucocorticoid regulation                                               | 15                       |
| 24                | Immune response_TLR signaling pathways                                                               | 15                       |
